# Supplementary material
Source: PubMed Central journal article supplement (PMC6344622)
Supplement: 8c983d0508862f8874a028590d6d9f0b_AEM.02399-18-s0001.pdf [file 8c983d0508862f8874a028590d6d9f0b_AEM.02399-18-s0001.pdf]

1  
2  
3  
4  
5  
6  
7  
8  
9  
10  
11  
12  
13  
14  
15  
16

## Supplemental Material

**Title: A new functional marker gene of polycyclic aromatic hydrocarbons (PAHs) degrading bacteria: *pahE***

Chengyue Liang, Yong Huang and Hui Wang<sup>#</sup>

*State Key Joint Laboratory on Environment Simulation and Pollution Control, School of Environment, Tsinghua University, Beijing, 100084, China*

Running Head: a new functional marker gene of PAH degraders

<sup>#</sup> Address correspondence to Hui Wang, wanghui@tsinghua.edu.cn, State Key Joint Laboratory on Environment Simulation and Pollution Control, School of Environment, Tsinghua University, Beijing, 100084, China. Tel.: +86 010-62772137, fax: +86 01062771472.

## 17 **Material and Methods**

18 **PAH degradation studies.** To determine the degradation potential of the selected  
19 samples, degradation studies were initiated in 150-ml flasks using 10 g of ODS soil or  
20 BAS sludge or 10 ml ASE bacterium solution and 100 ml of minimal medium (1) spiked  
21 individually with 50 mg l<sup>-1</sup> of naphthalene (Nah) or phenanthrene (Phn) or pyrene (Pyr).  
22 Flasks were shaken at 150 rev min<sup>-1</sup> for up to 15 days at 37 °C. At each time point,  
23 samples were removed and used for PAH extraction and HPLC analysis (2).

24 **DNA extraction of the strains and environmental samples.** All cultures and  
25 environmental samples used for examination of PCR assay specificity and screened for  
26 *pahE* and *pahAc* of PAH-degrading bacteria are listed together with sampling details  
27 and DNA extraction methods in Table S3. The pure cultures included reference PAH-  
28 degrading bacteria (those which could completely mineralize PAHs or grow on PAHs  
29 as the only carbon source), other aromatic hydrocarbon degraders (non-PAH degraders)  
30 and control bacteria. Environment samples were collected from the following sites:  
31 chronically crude oil contaminated soil (depth, 0 to 5 cm) collected from Shengli  
32 oilfield, Shandong, China, activated sludge from Bei Xiaohe urban sewage treatment  
33 plant, Beijing, China, and an enrichment culture for PAHs degrading bacteria inoculated  
34 (with a mixture of phenanthrene (100 mg l<sup>-1</sup>) and pyrene (100 mg l<sup>-1</sup>) was supplied as  
35 the only carbon and energy source) from the activated sludge of Qing He urban sewage  
36 treatment plant, Beijing, China. DNA extraction from bacteria pure cultures were  
37 performed using TIANamp Bacteria DNA kit (TIANGEN BIOTECH (Beijing) co.,  
38 LTD) according to the manufacturer's protocol. The DNA extracts were finally  
39 suspended in 100 µl of TE buffer.

40 Genomic DNA of environmental samples was extracted by slightly modifying the  
41 FastDNA® SPIN Kit for Soil (MP Biomedicals, LLC) manufacturer's instructions.

42 Briefly, 0.3 g contaminated soil or activated sludge was added into the Lysing Matrix E  
43 Tube. For enrichment cultures, cells were pelleted at 4 °C, 8000 rpm centrifugation for  
44 10 min, directly resuspended in 978 µl of Sodium Phosphate Buffer in the kit and then  
45 added into the Lysing Matrix E Tube . In order to break cells fully and ensure the  
46 integrity of Genomic DNA simultaneously, the tubes were vortexed at a slower speed  
47 5.0 for less time 30s but twice instead once. During the intervals between the two  
48 vortexes, tubes were cooled in the ice box to avoid superheat. In addition, the 12<sup>th</sup> and  
49 13<sup>th</sup> steps in the official instructions for washing up impurities of salt were replicated  
50 three times instead of one time.

51 **Primers design.** Primer for PCR amplification of *pahE* genes were designed based  
52 on the *pahE* reference database by using Codehop (COnsensus-DEgenerate-Hybrid  
53 Oligonucleotide Primer) (3). Length limitations imposed by Illumina amplicon  
54 sequencing make it difficult to identify suitable degenerate primers for all *pahE*, so  
55 different primer sets were designed to target each of the 4 clades identified in the *pahE*  
56 phylogenetic tree (Table 1). The criteria for primer selection were as follows: 1)  
57 appropriate amplification length (300 ~ 400 bp) and similar regiospecificity; 2) low  
58 degeneracy and higher T<sub>m</sub>; 3) GC content <60%. The selected primer set for each  
59 clade was manually modified to minimize self-complementarity, primer dimers  
60 formation and hairpin loop structures. The annealing temperature for each clade-  
61 specific primer pair was optimized using genomic DNA extracted from the selected  
62 reference bacterial strain for the clade by temperature gradient PCR. The optimum  
63 annealing temperature was considered to be the highest temperature at which a strong  
64 band was observed.

65 **Specificity of the *pahE* and *pahAc* PCR assay.** Primer specificity for each of the  
66 *pahE* gene clade and *pahAc* gene was validated via PCR. PCR products of each

67 reference organism at the determined optimum annealing temperature were checked for  
68 size and purity on 1.8% agarose gel and purified using a Gv-High-Efficiency Agarose  
69 Gel DNA Purification Kit (GEN-VIEW Scientific INC) according to the manufacturer's  
70 instructions. The purified products were cloned using the TA Cloning kit (TaKaRa), and  
71 inserts in transformants were checked using the primer M13-47 and RV-M targeting the  
72 vector pMD18-T sequence. Further, clones with correct inserts were selected for  
73 sequencing in a PRISM ready reaction dye terminator cycle sequencing kit according  
74 to the instructions of the manufacturer (TsingKe, Beijing, China). The obtained  
75 sequences were compared against the GenBank database using BLAST to confirm that  
76 amplicon sequences match target gene sequences.

77

**Table S1 Sequence information of reference PahAc and PahE used in this study.**

| <b>Strains</b>                            | <b>abbreviation</b> | <b>PahAc ID</b> | <b>PahE ID</b> |
|-------------------------------------------|---------------------|-----------------|----------------|
| <i>Pseudomonas stutzeri</i> AN10          | Pseudo AN10         | AFM32591        | EPL61966       |
| <i>Pseudomonas bauzanensis</i> W13Z2      | Pseudo W13Z2        | EZQ14080        | EZQ14085       |
| <i>Pseudomonas stutzeri</i> B1SMN1        | Pseudo B1SMN1       | EPL61971        | AAB62713       |
| <i>Pseudomonas stutzeri</i> 19SMN4        | Pseudo 19SMN4       | AHY45194        | AHY45199       |
| <i>Pseudomonas aeruginosa</i> PaK1        | Pseudo PaK1         | BAA12240        | BAA12246       |
| <i>Pseudomonas stutzeri</i> KOS6          | Pseudo KOS6         | EWC41262        | AAO64280       |
| <i>Pseudomonas putida</i> ND6             | Pseudo ND6          | AAP44288        | AAP44192       |
| <i>Pseudomonas putida</i> NCIB 9816-4-1   | Pseudo 9816-4       | 1O7W:A          | AFM32586       |
| <i>Pseudomonas putida</i> BS202           | Pseudo BS202        | AAB62707        | BAE92162       |
| <i>Pseudomonas putida</i> OUS82           | Pseudo OUS82        | BAA20391        | BAA20397       |
| <i>Pseudomonas putida</i> G7              | Pseudo G7           | BAE92156        | EWC41257       |
| <i>Ralstonia</i> sp. U2                   | Ralsto U2           | AAD12610        | AAD12616       |
| <i>Acidovorax</i> sp. JHL-9               | Acido JHL-9         | WP_026437498    | WP_026437504   |
| <i>Burkholderia multivorans</i> DDS 15A-1 | Burk DDS15A-1       | AIO74308        | AIO75636       |
| <i>Comamonas testosteroni</i> JC12        | Coma JC12           | KGH10180        | KGH10186       |
| <i>Polaromonas naphthalenivorans</i> CJ2  | Polaro CJ2          | AAZ93388        | AAZ93394       |
| <i>Burkholderia</i> sp. DNT               | Burk DNT            | AAB09766        | NO             |
| <i>Burkholderia cepacia</i> R34           | Burk R34            | AAL50021        | NO             |
| <i>Comamonas</i> sp. JS765                | Coma JS765          | 2BMO:A          | NO             |
| <i>Acidovorax</i> sp. JS42                | Acido JS42          | AAB40383        | NO             |
| <i>Pseudomonas stutzeri</i> ZWLR2-1       | Pseudo ZWLR2-1      | ADQ90222        | NO             |
| <i>Diaphorobacter</i> sp. DS1             | Diapho DS1          | AGH09221        | NO             |
| <i>Diaphorobacter</i> sp. DS2             | Diapho DS2          | AGH09226        | NO             |
| <i>Alteromonas</i> sp. SN2                | Altero SN2          | AEF05078        | AEF05081       |
| <i>Marinomonas</i> sp. D104               | Marino D104         | ETI60159        | ETI60157       |
| <i>Burkholderia sartisoli</i> RP007       | Burk RP007          | AAD09872        | AAD09869       |

|                                                   |                |              |              |
|---------------------------------------------------|----------------|--------------|--------------|
| <i>Burkholderia</i> sp. K24                       | Burk K24       | KFX64020     | KFX64016     |
| <i>Nevskia ramosa</i> DSM11499                    | Nevskia 11499  | WP_022978279 | WP_028475726 |
| <i>Hydrocarboniphaga effusa</i> AP103T            | Hydroca AP103  | EIT71332     | EIT71336     |
| <i>Algiphilus aromaticivorans</i> DG1253          | Algiph 1253    | WP_043770866 | WP_043765396 |
| <i>Polycyclovorans algicola</i> TG408             | Polycy TG408   | WP_029889175 | WP_029889213 |
| <i>Burkholderia</i> sp. DBT1                      | Burk DBT1      | AAK62353     | AER08042     |
| <i>Alcaligenes faecalis</i> AFK2                  | Alcali AFK2    | BAA76323     | BAA76332     |
| <i>Delftia</i> sp. Cs1-4                          | Delftia Cs1-4  | AEF88772     | AEF88788     |
| <i>Acidovorax</i> sp. NA3                         | Acido NA3      | ACG70971     | ART51183     |
| <i>Burkholderia</i> sp. Ch1-1                     | Burk Ch1-1     | EIF28482     | EIF28466     |
| <i>Cycloclasticus</i> sp. P1                      | Cyclo P1       | AFT68259     | AFT67194     |
| <i>Cycloclasticus</i> sp. PY97M                   | Cyclo PY97M    | EPD12175     | EPD12632     |
| <i>Cycloclasticus pugetii</i> PS-1                | Cyclo PS-1     | WP_016391028 | WP_015005964 |
| <i>Novosphingobium aromaticivorans</i> F199       | Novosphi F199  | ABP64144     | ABP64082     |
| <i>Sphingomonas</i> sp. LH128                     | Sphingo LH128  | EJU15002     | EJU12841     |
| <i>Hyphomonas oceanitis</i> SCH89                 | Hypho SCH89    | KDA00874     | KDA01194     |
| <i>Novosphingobium pentaromativorans</i><br>US6-1 | Novosphi US6-1 | AIT82665     | AIT82654     |
| <i>Sphingomonas paucimobilis</i> EPA505           | Sphingo EPA505 | EZP70079     | EZP70093     |
| <i>Sphingobium yanoikuyae</i> B1                  | Sphingo B1     | 2GBW:A       | ABM79813     |
| <i>Novosphingobium</i> sp. PP1Y                   | Novosphi PP1Y  | CCA92480     | CCA93880     |
| <i>Sphingobium</i> sp. KK22                       | Sphingo KK22   | WP_025551213 | WP_025548219 |
| <i>Pseudomonas</i> sp. P51                        | Pseudo P51     | AAC43632     | NO           |
| <i>Pseudomonas putida</i> F1                      | Pseudo F1      | AAA26005     | NO           |
| <i>Pseudomonas pseudoalcaligenes</i> KF707        | Pseudo KF707   | AAA25743     | NO           |
| <i>Burkholderia xenovorans</i> LB400              | Burk LB400     | AAB63425     | NO           |
| <i>Citricella aestuarii</i> Strain 357            | Citrei 357     | EIE49957     | EIE49938     |
| <i>Oceanicola</i> sp. MCTG156(1a)                 | Oceani MCTG156 | WP_036563000 | WP_036561753 |

|                                              |                  |              |              |
|----------------------------------------------|------------------|--------------|--------------|
| <i>Polymorphum gilvum</i> SL003B-26A1T       | Polymo 26A1      | ADZ72512     | ADZ72499     |
| <i>Thioclava dalianensis</i> DLFJ1-1         | Thiocl DLFJ11    | KEP68756     | KEP68746     |
| <i>Rhodovulum</i> sp. NI22                   | Rhodovu NI22     | KGB81046     | KGB81035     |
| <i>Martelella</i> sp. StrainAD-3             | Martel AD-3      | WP_024706839 | WP_024706824 |
| <i>Paenibacillus</i> sp. YK5                 | Paenibaci YK5    | BAE53401     | NO           |
| <i>Terrabacter</i> sp. DBF63                 | Terra DBF63      | BAB55886     | NO           |
| <i>Paenibacillus</i> sp. TSY30               | Paenibaci TSY30  | BAK48593     | NO           |
| <i>Terrabacter</i> sp. DBF63                 | Terra DBF63      | BAC54156     | NO           |
| <i>Arthrobacter keyseri</i> 12B              | Arthro 12B       | AAK16534     | NO           |
| <i>Mycobacterium vanbaalenii</i> PYR-1       | Myco PYR-1       | Q44256       | NO           |
| <i>Rhodococcus</i> sp. TFB                   | Rhodococcus TFB  | AAV57926     | NO           |
| <i>Rhodococcus</i> sp. DK17                  | Rhodococcus DK17 | ABP48118     | NO           |
| <i>Arthrobacter phenanthrenivorans</i> Sphe3 | Arthro Sphe3     | ADX75094     | ADX75098     |
| <i>Sciscionella marina</i> DSM 45152         | Scisci 45152     | WP_020501050 | WP_020501058 |
| <i>Amycolatopsis methanolica</i> 239         | Amyco 239        | AIJ21952     | AIJ21944     |
| <i>Rhodococcus opacus</i> R7                 | Rhodo R7         | AII11432     | AII11501     |
| <i>Rhodococcus wratislaviensis</i> IFP2016   | Rhodo IFP2016    | ELB89368     | ELB89137     |
| <i>Rhodococcus imtechensis</i> RKJ300        | Rhodo RKJ300     | EID78828     | EID78824     |
| <i>Rhodococcus opacus</i> TKN14              | Rhodo TKN14      | BAE53376     | BAE53379     |
| <i>Rhodococcus opacus</i> B4                 | Rhodo B4         | BAH47212     | BAH47216     |
| <i>Rhodococcus opacus</i> SAO101             | Rhodo SAO101     | BAD02377     | BAD02380     |
| <i>Rhodococcus</i> sp. P200                  | Rhodo P200       | AAR05114     | AAR05117     |
| <i>Gordonia</i> sp. CC-NAPH129-6             | Gordo NAPH129    | ACV96857     | ACV96860     |
| <i>Rhodococcus</i> sp. P400                  | Rhodo P400       | AAR05106     | AAR05109     |
| <i>Rhodococcus opacus</i> M213               | Rhodo M213       | EKT84394     | EKT84398     |
| <i>Rhodococcus</i> sp. BCP1                  | Rhodo BCP1       | KDE09919     | KDE09923     |
| <i>Rhodococcus</i> sp. I24                   | Rhodo I24        | AAD25395     | AAD25398     |
| <i>Nocardioides</i> sp. KP7                  | Nocar KP7        | BAA94708     | BAA94711     |

|                                                        |                 |                                  |          |
|--------------------------------------------------------|-----------------|----------------------------------|----------|
| <i>Mycobacterium</i> sp. JLS                           | Myco JLS        | ABN97453<br>ABN98023             | ABN97402 |
| <i>Mycobacterium aromaticivorans</i><br>JS19b1T        | Myco JS19b1     | KDE96988<br>KDE97321<br>ABL90893 | KDE97298 |
| <i>Mycobacterium</i> sp. KMS                           | Myco KMS        | ABL94808<br>ABL94821             | ABL90865 |
| <i>Mycobacterium</i> sp. MCS                           | Myco MCS        | ABG07752<br>ABG11558<br>ETZ36022 | ABG07743 |
| <i>Mycobacterium intracellulare</i> MIN<br>052511 1280 | Myco MIN1280    | ETZ38624<br>ETZ38652<br>AEV73692 | ETZ38640 |
| <i>Mycobacterium rhodesiae</i> NBB3                    | Myco NBB3       | AEV73714<br>AEV73736<br>ABP43029 | AEV73685 |
| <i>Mycobacterium gilvum</i> PYR-GCK                    | Myco PYR-GCK    | ABP43050<br>ABP43151<br>ADT96888 | ABP43160 |
| <i>Mycobacterium gilvum</i> Spyr1                      | Myco Spyr1      | ADT96910<br>ADT96931<br>ABM11333 | ADT96879 |
| <i>Mycobacterium vanbaalenii</i> PYR-1                 | Myco PYR-1      | ABM11390<br>ABM11369             | ABM11319 |
| <i>Comamonas testosteroni</i> BR60                     | Coma BR60       | Q44256                           | NO       |
| <i>Pseudomonas putida</i> NMH102-2                     | Pseudo NMH102-2 | Q05183                           | NO       |

---

79 \*NO: indicate this strain has no PahE sequences.



**Table S3 Environmental samples and bacteria cultures used in this study.**

| Sample type                                    | Sample location                                                    | Sample name | Sample date | DNA extraction protocol  | Sequencing technique | Reference (for strain or sample) |
|------------------------------------------------|--------------------------------------------------------------------|-------------|-------------|--------------------------|----------------------|----------------------------------|
| <b>Strains</b>                                 |                                                                    |             |             |                          |                      |                                  |
| <i>Pseudomonas stutzeri</i> 1-5                |                                                                    |             |             | TIANamp Bacteria DNA kit | Sanger sequencing    | This study                       |
| <i>Delftia</i> sp. Cs4-1                       |                                                                    |             |             | TIANamp Bacteria DNA kit | Sanger sequencing    | (4)                              |
| <i>Marinomonas profundimaris</i> D104          |                                                                    |             |             | TIANamp Bacteria DNA kit | Sanger sequencing    | (5)                              |
| <i>Sphingomonas</i> sp. 1-1                    |                                                                    |             |             | TIANamp Bacteria DNA kit | Sanger sequencing    | This study                       |
| <i>Novosphingobium pentaromativorans</i> US6-1 |                                                                    |             |             | TIANamp Bacteria DNA kit | Sanger sequencing    | (6)                              |
| <i>Rhodococcus</i> sp. B4                      |                                                                    |             |             | TIANamp Bacteria DNA kit | Sanger sequencing    | (7)                              |
| <i>Mycobacterium vanbaalenii</i> PYR-          |                                                                    |             |             | TIANamp Bacteria DNA kit | Sanger sequencing    | (8)                              |
| <i>Thioclava dalianensis</i> DLFJ1-1           |                                                                    |             |             | TIANamp Bacteria DNA kit | Sanger sequencing    | (9)                              |
| <i>Pseudomonas stutzeri</i> ZWLR2-1            |                                                                    |             |             | TIANamp Bacteria DNA kit | Sanger sequencing    | (10)                             |
| <i>Comamonas</i> sp.CNB-1                      |                                                                    |             |             | TIANamp Bacteria DNA kit | Sanger sequencing    | (11)                             |
| <i>E.coli</i> DH5 $\alpha$                     |                                                                    |             |             | TIANamp Bacteria DNA kit | Sanger sequencing    |                                  |
| <i>Bacillus subtilis</i> 168                   |                                                                    |             |             | TIANamp Bacteria DNA kit | Sanger sequencing    |                                  |
| <b>Environmental Samples</b>                   |                                                                    |             |             |                          |                      |                                  |
| Chronically crude oil contaminated soil        | Surface soil (depth, 0 to 5 cm), Shengli oilfield, Shandong, China | ODS         | Sep, 2015   | FastDNA® SPIN Kit        | Illumina HiSeq2500   | This study                       |

|                                     |                                                                                                                                                                                                                                     |     |           |                   |                    |            |
|-------------------------------------|-------------------------------------------------------------------------------------------------------------------------------------------------------------------------------------------------------------------------------------|-----|-----------|-------------------|--------------------|------------|
| Activated sludge                    | Bei Xiaohe urban sewage treatment plant, Beijing, China                                                                                                                                                                             | BAS | Nov, 2015 | FastDNA® SPIN Kit | Illumina HiSeq2500 | This study |
| PAH degradation enrichment cultures | Inoculated the activated sludge (taken from Qing He urban sewage treatment plant, Beijing, China) with mixture of phenanthrene (100 mg l <sup>-1</sup> ) and pyrene (100 mg l <sup>-1</sup> ) as the only carbon and energy source. | ASE | Nov, 2015 | FastDNA® SPIN Kit | Illumina HiSeq2500 | This study |

**Table S4. Biodegradation of polycyclic aromatic hydrocarbons (PAHs) in studied samples.**

Residual PAHs analysis was carried out by liquid chromatography and extraction efficiency of all the three compounds was >90%. The values given here are the average of three experiments.

| Samples | Substrate | Day 0 (mg l <sup>-1</sup> ) | Day 7 (mg l <sup>-1</sup> ) | Day 15 (mg l <sup>-1</sup> ) |
|---------|-----------|-----------------------------|-----------------------------|------------------------------|
| ODS     | Nah       | 50                          | 18.7                        | N.D                          |
|         | Phn       | 50                          | 25.6                        | 4.6                          |
|         | Pyr       | 50                          | 37.3                        | 10.4                         |
| ASE     | Nah       | 50                          | 9.7                         | N.D                          |
|         | Phn       | 50                          | 10.2                        | N.D                          |
|         | Pyr       | 50                          | 24.3                        | 5.7                          |
| BAS     | Nah       | 50                          | 48.2                        | 45.5                         |
|         | Phn       | 50                          | 48.9                        | 47.6                         |
|         | Pyr       | 50                          | 49.3                        | 48.9                         |

\*Nah: naphthalene, Phn: phenanthrene, Pyr: pyrene.

\*N. D: not detected.

\*ODS: a chronically crude oil contaminated soil, ASE: an enrichment culture of PAHs-degrading bacteria, BAS: an activated sludge of urban wastewater treatment plant.

**Table S5** The coverage and specificity of the designed *pahE* primer tested *in silico*.

| <i>pahE</i> reference sequences     | Primer sets                                                                         |               |               |               |                                                                                      |     |     |     |
|-------------------------------------|-------------------------------------------------------------------------------------|---------------|---------------|---------------|--------------------------------------------------------------------------------------|-----|-----|-----|
| Nucleotide ID Strain Protein ID     | pahE1F&pahE1R                                                                       | pahE2F&pahE2R | pahE3F&pahE3R | pahE4F&pahE4R |                                                                                      |     |     |     |
| AB004059 Pseudo_OUS82 BAA20397      | 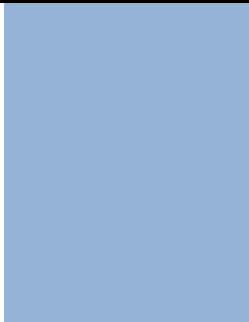 |               |               |               |                                                                                      |     |     |     |
| AB237655 Pseudo_G7 BAE92162         |                                                                                     |               |               |               |                                                                                      |     |     |     |
| AF491307 Pseudo_9816-4 AAO64280     |                                                                                     |               |               |               |                                                                                      |     |     |     |
| AMCZ02000012.1 Pseudo_KOS6 EWC41257 |                                                                                     |               |               |               |                                                                                      |     |     |     |
| AMVM01000007 Pseudo_B1SMN1 EPL61966 |                                                                                     |               |               |               |                                                                                      |     |     |     |
| AF010471 Pseudo_BS202 AAB62713      |                                                                                     |               |               |               | N.D                                                                                  | N.D | N.D | N.D |
| CP003677 Pseudo_AN10 AFM32586       |                                                                                     |               |               |               |  |     |     |     |
| CP007510 Pseudo_19SMN4 AHY45199     |                                                                                     |               |               |               |                                                                                      |     |     |     |
| D84146 Pseudo_PaK1 BAA12246         |                                                                                     |               |               |               |                                                                                      |     |     |     |
| CP008730 Burk_DDS15A-1 AIO75636     |                                                                                     |               |               |               |                                                                                      |     |     |     |
| AY208917 Pseudo_ND6 AAP44192        |                                                                                     |               |               |               |                                                                                      |     |     |     |
| JFHS01000025 Pseudo_W13Z2 EZQ14085  |                                                                                     |               |               |               |                                                                                      |     |     |     |
| AF036940 Ralsto_U2 AAD12616         |                                                                                     |               |               |               |                                                                                      |     |     |     |
| DQ167474 Polaro_CJ2 AAZ93394        |                                                                                     |               |               |               |                                                                                      |     |     |     |

NZ\_AUEX01000033|Acido\_JHL-9|WP\_026437504

AWOU01000028|Coma\_JC12|KGH10186

AWTM01000090.1|Coma\_DS1|KGH21324

JH603161|Burk\_Ch1-1|EIF28466

JMIK01000009.1|Burk\_K24|KFX64016

AF061751|Burk\_RP007|AAD09869

AF404408|Burk\_DBT1|AER08042

AYOZ01000018.1|Marino\_D104|ETI60157

CP002339.1|Altero\_SN2|AEF05081

AJKJ01000121.1|Citrei\_357|EIE49938

JQFU01000048.1|Rhodovu\_NI22|KGB81035

CP002568|Polymo\_26A1|ADZ72499

AKGD01000001.1|Hydroca\_AP103|EIT71336

JHEH01000024|Thiocl\_DLFJ1-1|KEP68746

NZ\_ATVI01000011|Nevskia\_11499|WP\_084711626

NZ\_AYGY02000037|Martel\_AD-3|WP\_024706824

NZ\_JOMH01000001|Polycy\_TG408|WP\_029889213

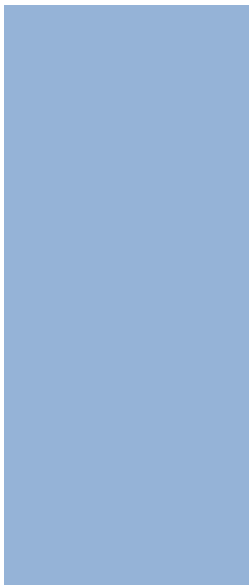

N.D

N.D

N.D

N.D

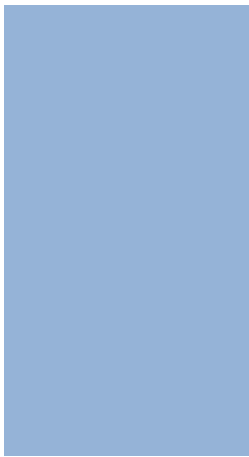

|                                             |     |     |     |     |
|---------------------------------------------|-----|-----|-----|-----|
| NZ_JPOG01000001 Algiph_1253 WP_043765396    |     |     |     |     |
| NZ_JQMY01000001 Oceani_MCTG156 WP_036561753 |     |     |     |     |
| ARYL01000034 Hypho_SCH89 KDA01194           |     |     |     |     |
| AB024945 Alcali_AFK2 BAA76332               |     |     |     |     |
| CP002735 Delftia_Cs1-4 AEF88788             |     |     |     |     |
| CP021361 Acidov_NA3 ART51183                |     |     |     |     |
| ALVC01000135 Sphingo_LH128 EJU12841         |     |     |     |     |
| BATN01000019.2 Sphingo_KK22 WP_0255482      |     |     |     |     |
| CP009294 Novosphi_US6-1 AIT82654            |     |     |     |     |
| EF151283.1 Sphingo_B1 ABM79813              |     |     |     |     |
| FR856862 Novosphi_PP1Y CCA93880             |     |     |     |     |
| JFYY01000019 Sphingo_EPA505 EZP70093        |     |     |     |     |
| JNFC01000067 Sphingo_LC363 KGB52059         |     |     |     |     |
| CP000676 Novosphi_F199 ABP64082             |     |     |     |     |
| ASHL01000007 Cyclo_PY97M EPD12632           | N.D | N.D | N.D | N.D |
| CP003230 Cyclo_P1 AFT67194                  | N.D | N.D | N.D | N.D |
| NZ_ARVU01000001 Cyclo_PS-1 WP_015005964     | N.D | N.D | N.D | N.D |

GQ848233.3|Gordo\_NAPH129|ACV96860  
CP008952|Rhodo\_R7|AII11501  
CP009110|Amyco\_239|AIJ21944  
AVAE01000030|Rhodo\_BCP1|KDE09923  
ANIU01000578|Rhodo\_IFP2016|ELB89137  
AP011117|Rhodo\_B4|BAH47216  
AY392423.2|Rhodo\_P400|AAR05109  
AY392424.3|Rhodo\_P200|AAR05117  
CP002380|Arthro\_Sphe3|ADX75098  
AB110633|Rhodo\_SAO101|BAD02380  
AB206671|Rhodo\_TKN14|BAE53379  
AF121905|Rhodo\_I24|AAD25398  
AJJH01000096|Rhodo\_RKJ300|EID78824  
AJYC02000009|Rhodo\_M213|EKT84398  
NZ\_KB905425|Scisci\_45152|WP\_020501058  
AB031319|Nocar\_KP7|BAA94711  
CP003169|Myco\_NBB3|AEV73685

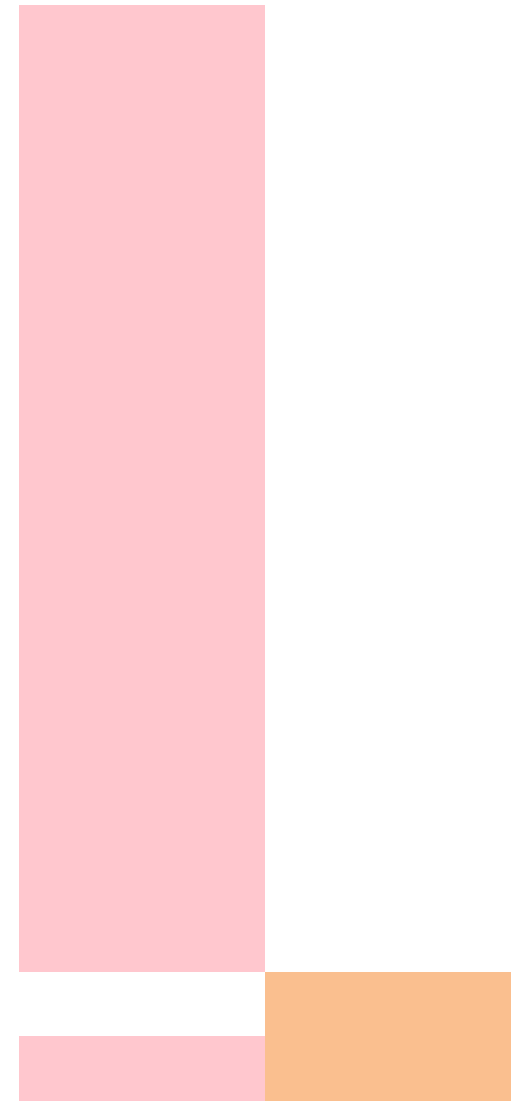

|                                                       |     |     |           |     |
|-------------------------------------------------------|-----|-----|-----------|-----|
| CP000384 Myco_MCS ABG07743                            |     |     |           |     |
| CP000511 Myco_PYR-1 ABM11319                          |     |     |           |     |
| CP000518 Myco_KMS ABL90865                            |     |     |           |     |
| CP000580 Myco_JLS ABN97402                            |     |     |           |     |
| CP000656 Myco_PYR-GCK ABP43160                        |     |     |           |     |
| CP002385 Myco_Spyr1 ADT96879                          |     |     |           |     |
| JALN02000002 Myco_JS19b1 KDE97298                     |     |     |           |     |
| JAON01000018 Myco_MIN1280 ETZ38640                    |     |     |           |     |
| NZ_AUNF01000055 Thermotoga_sp._A7A WP_029683321       | N.D | N.D | N.D       | N.D |
| NZ_JSBN01000007 Sphingomonas_sp._Ant_H11 WP_033863407 | N.D | N.D | N.D       | N.D |
| AEVT01000093 Vibrio_sinaloensis_DSM_21326 EGA69073    | N.D | N.D | N.D       | N.D |
| AMRV01000001 Alpha_proteobacterium_JLT2015 EMD84320   | N.D | N.D | N.D       | N.D |
| L17071 Rhizobium_meliloti_rhizopine AAA26301          | N.D | N.D | N.D       | N.D |
| <b>Targets in Total</b>                               |     |     | <b>68</b> |     |
| <b>Total</b>                                          |     |     | <b>73</b> |     |

Notes: The colored cells indicated that the primers target the sequences; N.D: not targeted; Gray texted cells are non-PAH degrading homologs in the same protein family with *pahE*.



**Table S6 The amplicons of *pahAc* or *pahE* from the environment samples for Illumina sequencing.**

| Environmental samples                                             | <i>pahAc</i> | <i>pahE</i>           |                       |                       |                       |
|-------------------------------------------------------------------|--------------|-----------------------|-----------------------|-----------------------|-----------------------|
|                                                                   |              | <i>pahE1F&amp;E1R</i> | <i>pahE2F&amp;E2R</i> | <i>pahE3F&amp;E3R</i> | <i>pahE4F&amp;E4R</i> |
| Contaminated-oil field soil (ODS)                                 | √            | √                     | √                     | √                     | -                     |
| Phenanthrene and Pyrene enrichment culture (ASE)                  | √            | √                     | -                     | √                     | -                     |
| Activated sludge of Bei Xiaohe urban sewage treatment plant (BAS) | √            | √                     | -                     | √                     | -                     |

√: indicating that right and specific stretch were amplified;

-: indicating that no anything or wrong size fragments were amplified.

**Table S7 Identities of the amino acid sequences deduced from the Illumina sequencing reads obtained from environmental samples to the reference sequences (complementary to Fig 5.).**

| <b>OTUs</b>          | <b>Closest relative amino acid sequence accession number and bacteria</b> | <b>Amino acid Identity (%)</b> |
|----------------------|---------------------------------------------------------------------------|--------------------------------|
| OTU_75               | BAB55886 Terra_DBF63 dibenzofuran                                         | 51.26                          |
| OTU_146              | ACG70971 Acido_NA3                                                        | 50.91                          |
| OTU_151              | WP_024706839 Martel_AD-3                                                  | 53.70                          |
| OTU_152              | ETZ38624 Myco_MIN1280                                                     | 52.78                          |
| OTU_153              | ADZ72512 Polymo_26A1                                                      | 53.70                          |
| OTU_154              | WP_024706839 Martel_AD-3                                                  | 51.85                          |
| OTU_158              | BAK48593 Paenibaci_TSY30 Dox/Naph                                         | 51.92                          |
| OTU_160              | WP_036563000 Oceani_MCTG156                                               | 53.70                          |
| OTU_162              | BAB55886 Terra_DBF63 dibenzofuran                                         | 50.46                          |
| OTU_163              | ADT96910 Myco_Spyr1                                                       | 95.37                          |
| OTU_165              | BAK48593 Paenibaci_TSY30 Dox/Naph                                         | 64.42                          |
| OTU_167              | BAK48593 Paenibaci_TSY30 Dox/Naph                                         | 67.31                          |
| <i>pahAc</i> OTU_169 | KGB81046 Rhodovu_NI22                                                     | 50                             |
| OTU_170              | WP_024706839 Martel_AD-3                                                  | 51.85                          |
| OTU_171              | WP_036563000 Oceani_MCTG156                                               | 58.33                          |
| OTU_172              | WP_029889175 Polycy_TG408                                                 | 50.93                          |
| OTU_182              | KFX64020 Burk_K24                                                         | 95.33                          |
| OTU_183              | EIT71332 Hydroca_AP103                                                    | 50.46                          |
| OTU_184              | AFM32591 Pseudo_AN10                                                      | 98.13                          |
| OTU_185              | BAK48593 Paenibaci_TSY30 Dox/Naph                                         | 51.92                          |
| OTU_187              | EIT71332 Hydroca_AP103                                                    | 75.70                          |
| OTU_188              | CCA92480 Novosphi_PP1Y                                                    | 85.05                          |
| OTU_190              | WP_026437498 Acido_JHL-9                                                  | 98.13                          |
| OTU_192              | 2GBW:A Sphingo_B1                                                         | 61.11                          |

|             |            |                           |       |
|-------------|------------|---------------------------|-------|
|             | OTU_199    | AAK62353 Burk_DBT1        | 97.17 |
|             | OTU_202    | ACG70971 Acido_NA3        | 70.76 |
|             | OTU_204    | ACG70971 Acido_NA3        | 70.76 |
|             | OTU_206    | EIT71332 Hydroca_API03    | 64.49 |
| <i>pahE</i> | E1_OTU_31  | EJU12841 Sphingo_LH128    | 86.29 |
|             | E1_OTU_32  | KGH10186 Coma_JC12        | 88.80 |
|             | E1_OTU_33  | EZQ14085 Pseudo_W13Z2     | 98.40 |
|             | E1_OTU_34  | KGH10186 Coma_JC12        | 76.00 |
|             | E1_OTU_35  | EZQ14085 Pseudo_W13Z2     | 95.20 |
|             | E1_OTU_36  | AER08042 Burk_DBT1        | 96.77 |
|             | E1_OTU_37  | AAZ93394 Polaro_CJ2       | 88.00 |
|             | E1_OTU_38  | ADZ72499 Polymor_26A1     | 87.20 |
|             | E1_OTU_40  | AAD12616 Ralsto_U2        | 98.40 |
|             | E1_OTU_41  | KFX64016 Burk_K24         | 95.16 |
|             | E1_OTU_42  | KGB52059 Sphingo_LC363    | 83.87 |
|             | E1_OTU_179 | EPL61966 Pseudo_B1SMN1    | 87.20 |
|             | E2_OTU_2   | ADX75098 Arthro_Sphe3     | 60.98 |
|             | E2_OTU_5   | KGB52059 Sphingo_LC363    | 88.53 |
|             | E2_OTU_6   | EJU12841 Sphingo_LH128    | 88.53 |
|             | E2_OTU_7   | EZQ14085 Pseudo_W13Z2     | 100   |
|             | E2_OTU_8   | WP_024706824 Martel_AD3   | 72.13 |
|             | E2_OTU_9   | WP_025548219 Sphingo_KK22 | 88.53 |
|             | E2_OTU_10  | WP_025548219 Sphingo_KK22 | 100   |
|             | E2_OTU_11  | EZP70093 Sphingo_EPA505   | 87.71 |
|             | E2_OTU_12  | KDA01194 Hypho_SCH89      | 96.72 |
|             | E2_OTU_13  | KGB52059 Sphingo_LC363    | 86.89 |
|             | E2_OTU_14  | EZP70093 Sphingo_EPA505   | 85.25 |
|             | E2_OTU_15  | ETI60157 Marino_D104      | 77.87 |

|            |                           |       |
|------------|---------------------------|-------|
| E2_OTU_19  | KDA01194 Hypho_SCH89      | 95.54 |
| E2_OTU_21  | KGB52059 Sphingo_LC363    | 84.55 |
| E3_OTU_544 | KDE09923 Rhodo_BCP1       | 95.37 |
| E3_OTU_606 | AIJ21944 Amyco_239        | 100   |
| E3_OTU_607 | KDE09923 Rhodo_BCP1       | 64.49 |
| E3_OTU_610 | ADX75098 Arthro_Sphe3     | 97.17 |
| E3_OTU_617 | KDE09923 Rhodo_BCP1       | 64.49 |
| E3_OTU_622 | WP_020501058 Scisci_45152 | 99.07 |
| E3_OTU_623 | AIJ21944 Amyco_239        | 80.37 |
| E3_OTU_803 | AII11501 Rhodo_R7         | 55.34 |
| E3_OTU_805 | AII11501 Rhodo_R7         | 67.96 |
| E3_OTU_825 | AII11501 Rhodo_R7         | 57.28 |
| E3_OTU_826 | EIE49938 Citrei_357       | 51.46 |
| E3_OTU_829 | AII11501 Rhodo_R7         | 59.22 |
| E3_OTU_834 | AII11501 Rhodo_R7         | 66.02 |
| E3_OTU_836 | AII11501 Rhodo_R7         | 58.25 |
| E3_OTU_842 | ABP64082 Novosphi_F199    | 56.31 |

**Table S8. The corresponding PahAc and PahE detected in the environmental samples and the detected higher resolution of *PahE* in *Pseudomonas* and *Sphingomonadaceae* (Complementary with Fig 5).**

| The branches in PahAc tree (Fig 5)                                                                                                                                                                             | <i>pahAc</i>                                      | <i>pahE</i>                                                                                           | The branches in PahE tree (Fig 5)                                                                                                                                                                                                                          |                                                                                                               |
|----------------------------------------------------------------------------------------------------------------------------------------------------------------------------------------------------------------|---------------------------------------------------|-------------------------------------------------------------------------------------------------------|------------------------------------------------------------------------------------------------------------------------------------------------------------------------------------------------------------------------------------------------------------|---------------------------------------------------------------------------------------------------------------|
|                                                                                                                                                                                                                | Genotypes                                         | Genotypes                                                                                             |                                                                                                                                                                                                                                                            |                                                                                                               |
| AAZ93388 Polaromonas naphthalenivorans CJ2<br>OTU 190<br>AAD12610 Ralstonia sp. U2<br>WP_026437498 Acidovorax sp. JHL-9<br>AIO74308 Burkholderia multivorans DDS 15A-1<br>KGH10180 Comamonas testosteroni JC12 | <i>Ralstonia</i> /<br><i>Comamonas</i>  <br>NagAc | Corresponding to<br>each other (indicated<br>by green double<br>sided arrow or green<br>box in Fig 5) | <i>Ralstonia</i> /<br><i>Comamonas</i>  <br>NagE<br>AAD12616 Ralstonia sp. U2<br>WP_026437504 Acido JHL9<br>E1 OTU 40<br>AIO75636 Burkholderia multivorans DDS 15A-1<br>KGH10186 Comamonas testosteroni JC12<br>AAZ93394 Polaromonas naphthalenivorans CJ2 |                                                                                                               |
| OTU 182<br>AAD09872 Burkholderia sartisoli RP007<br>KFX64020 Burkholderia sp. K24                                                                                                                              | <i>Burkholderia</i>  <br>PhnAc                    |                                                                                                       | <i>Burkholderia</i><br>  PhnE                                                                                                                                                                                                                              | E1 OTU 41<br>KFX64016 Burkholderia sp. K24<br>AAD09869 Burkholderia sartisoli RP007<br>E1 OTU 37<br>E1 OTU 32 |
|                                                                                                                                                                                                                |                                                   |                                                                                                       |                                                                                                                                                                                                                                                            | KGB81035 Rhodovulum sp. NI22                                                                                  |

|                                                |                                             |                               |                                                |
|------------------------------------------------|---------------------------------------------|-------------------------------|------------------------------------------------|
| OTU 183                                        | New potential<br>PahAc                      | New potential<br>PahE         | KEP68746 Thioclava dalianensis DLFJ1-1         |
| OTU 187                                        |                                             |                               | WP_028475726 Nevskia ramosa DSM11499           |
| WP_022978279 Nevskia ramosa DSM11499           |                                             |                               | WP_024706824 Martelevia sp. StrainAD-3         |
| EIT71332 Hydrocarboniphaga effusa AP103T       |                                             |                               | ADZ72499 Polymorphum gilvum SL003B-26A1T       |
| WP_043770866 Algiphilus aromaticivorans DG1253 |                                             |                               | E1 OTU 38                                      |
| OTU 206                                        |                                             |                               | WP_036561753 Oceanicola sp. MCTG156(1a)        |
| OTU 202                                        |                                             |                               | WP_043765396 Algiphilus aromaticivorans DG1253 |
| OTU 204                                        |                                             |                               | EIT71336 Hydrocarboniphaga effusa AP103T       |
| WP_029889175 Polycyclovorans algicola TG408    | WP_029889213 Polycyclovorans algicola TG408 | E3 OTU 826                    | EIE49938 Citricella aestuarii Strain 357       |
| AAK62353 Burkholderia sp. DBT1                 | <i>Burkholderia</i>  <br>PhnAc              | <i>Burkholderia</i><br>  PhnE | E1 OTU 36                                      |
| OTU 199                                        |                                             |                               | EIF28466 Burkholderia sp. Ch1-1                |
| BAA76323 Alcaligenes faecalis AFK2             |                                             |                               | AER08042 Burkholderia sp. DBT1                 |
| AEF88772 Delftia sp. Cs1-4                     |                                             |                               |                                                |
| ACG70971 Acidovorax sp. NA3                    |                                             |                               |                                                |

|                                                                                                                                                                                                                                                       |                                                  |                                                                                                                                                                         |                                                                                                                                                                                                                                                                                                                                                                                                                                                                                                                                                            |
|-------------------------------------------------------------------------------------------------------------------------------------------------------------------------------------------------------------------------------------------------------|--------------------------------------------------|-------------------------------------------------------------------------------------------------------------------------------------------------------------------------|------------------------------------------------------------------------------------------------------------------------------------------------------------------------------------------------------------------------------------------------------------------------------------------------------------------------------------------------------------------------------------------------------------------------------------------------------------------------------------------------------------------------------------------------------------|
| EIF28482 Burkholderia sp. Ch1-1                                                                                                                                                                                                                       |                                                  |                                                                                                                                                                         |                                                                                                                                                                                                                                                                                                                                                                                                                                                                                                                                                            |
| AFM32591 Pseudomonas stutzeri AN10<br>OTU 184<br>EZQ14080 Pseudomonas bauzanensis W13Z2<br>AHY45194 Pseudomonas stutzeri 19SMN4<br>EPL61971 Pseudomonas stutzeri B1SMN1<br>BAA12240 Pseudomonas aeruginosa PaK1<br>EWC41262 Pseudomonas stutzeri KOS6 | <i>Pseudomonas</i>  <br>NahAc/PahA3              | Higher<br>resolution of <i>pahE</i><br>were detected in<br><i>Pseudomonas</i> and<br><i>Sphingomonadaceae</i><br>degraders(indicated<br>by the green arc<br>①,②, Fig 5) | <i>Pseudomonas</i><br>  NahE/PahE<br><br><i>Pseudomonas</i><br>  NahE/PahE<br>AFM32586 Pseudomonas stutzeri AN10<br>E1 OTU 179<br>EZQ14085 Pseudomonas bauzanensis W13Z2<br>EWC41257 Pseudomonas stutzeri KOS6<br>EPL61966 Pseudomonas stutzeri B1SMN1<br>AHY45199 Pseudomonas stutzeri 19SMN4<br>E2 OTU 7<br>E1 OTU 33<br>AAP44192 Pseudomonas putida ND6<br>BAA12246 Pseudomonas aeruginosa PaK1<br>AAO64280 Pseudo NCIB 9816-4<br>AAB62713 Pseudomonas putida BS202<br>BAA20397 Pseudomonas putida OUS82<br>BAE92162 Pseudomonas putida G7<br>E1 OTU 35 |
| AAB62707 Pseudomonas putida BS202<br>AAP44288 Pseudomonas putida ND6<br>1O7W:A Pseudo NCIB 9816-4<br>BAE92156 Pseudomonas putida G7<br>BAA20391 Pseudomonas putida OUS82                                                                              | <i>Pseudomonas</i>  <br>NahAc/NahA3<br><br>/NdoB |                                                                                                                                                                         |                                                                                                                                                                                                                                                                                                                                                                                                                                                                                                                                                            |

|                                                  |                      |                    |                                                     |
|--------------------------------------------------|----------------------|--------------------|-----------------------------------------------------|
| ABP64144 Novosphingobium aromaticivorans F199    |                      |                    | E1 OTU 31                                           |
| EJU15002 Sphingomonas sp. LH128                  |                      |                    | E2 OTU 6                                            |
| OTU 188                                          |                      |                    | ABP64082 Novosphingobium aromaticivorans F199       |
| KDA00874 Hyphomonas oceanitis SCH89              |                      |                    | EJU12841 Sphingomonas sp. LH128                     |
| AIT82665 Novosphingobium pentaromativorans US6-1 | <i>Novosphingo</i> / |                    | E2 OTU 9                                            |
| EZP70079 Sphingomonas paucimobilis EPA505        | <i>Sphingo</i>       | <i>Novosphingo</i> | E2 OTU 12                                           |
| 2GBW:A Sphingobium yanoikuyae B1                 | BphA1                | / <i>Sphingo</i>   | E2 OTU 19                                           |
| CCA92480 Novosphingobium sp. PP1Y                |                      | PahE               | KDA01194 Hyphomonas oceanitis SCH89                 |
| WP_025551213 Sphingo KK22                        |                      |                    | AIT82654 Novosphingobium pentaromativorans<br>US6-1 |
|                                                  |                      |                    | EZP70093 Sphingomonas paucimobilis EPA505           |
|                                                  |                      |                    | E2 OTU 10                                           |
|                                                  |                      |                    | ABM79813 Sphingobium yanoikuyae B1                  |
|                                                  |                      |                    | CCA93880 Novosphingobium sp. PP1Y                   |
|                                                  |                      |                    | WP_025548219 Sphingobium sp. KK22                   |



## Figures

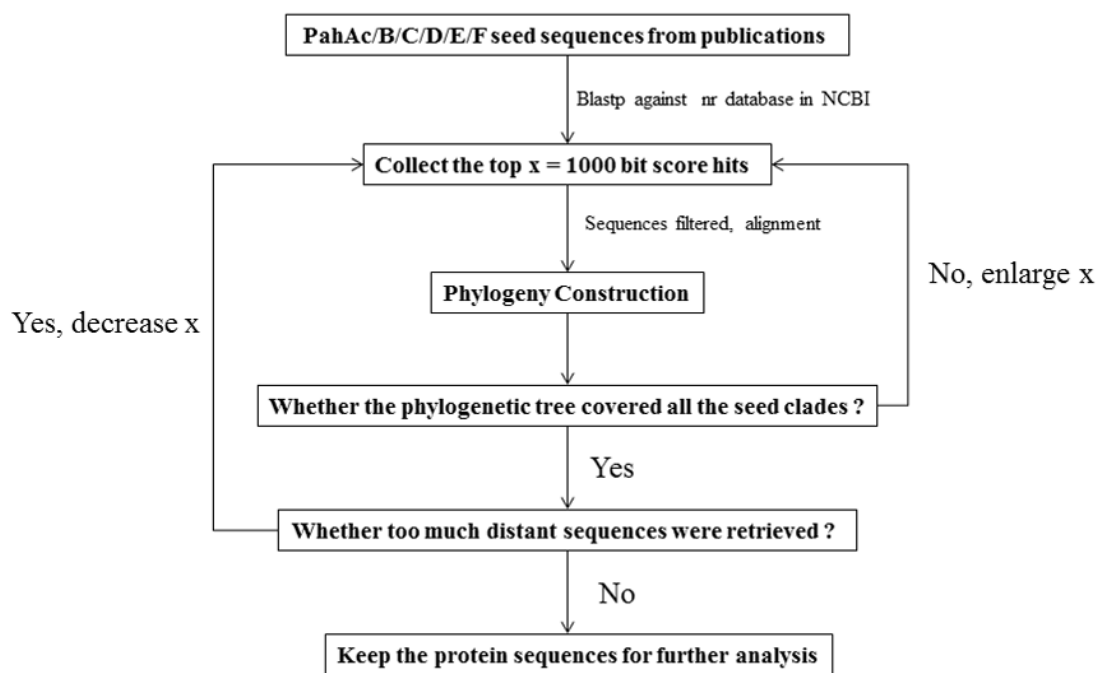

Fig S1. The schedule of collecting PahAc/B/C/D/E/F sequences from NCBI.

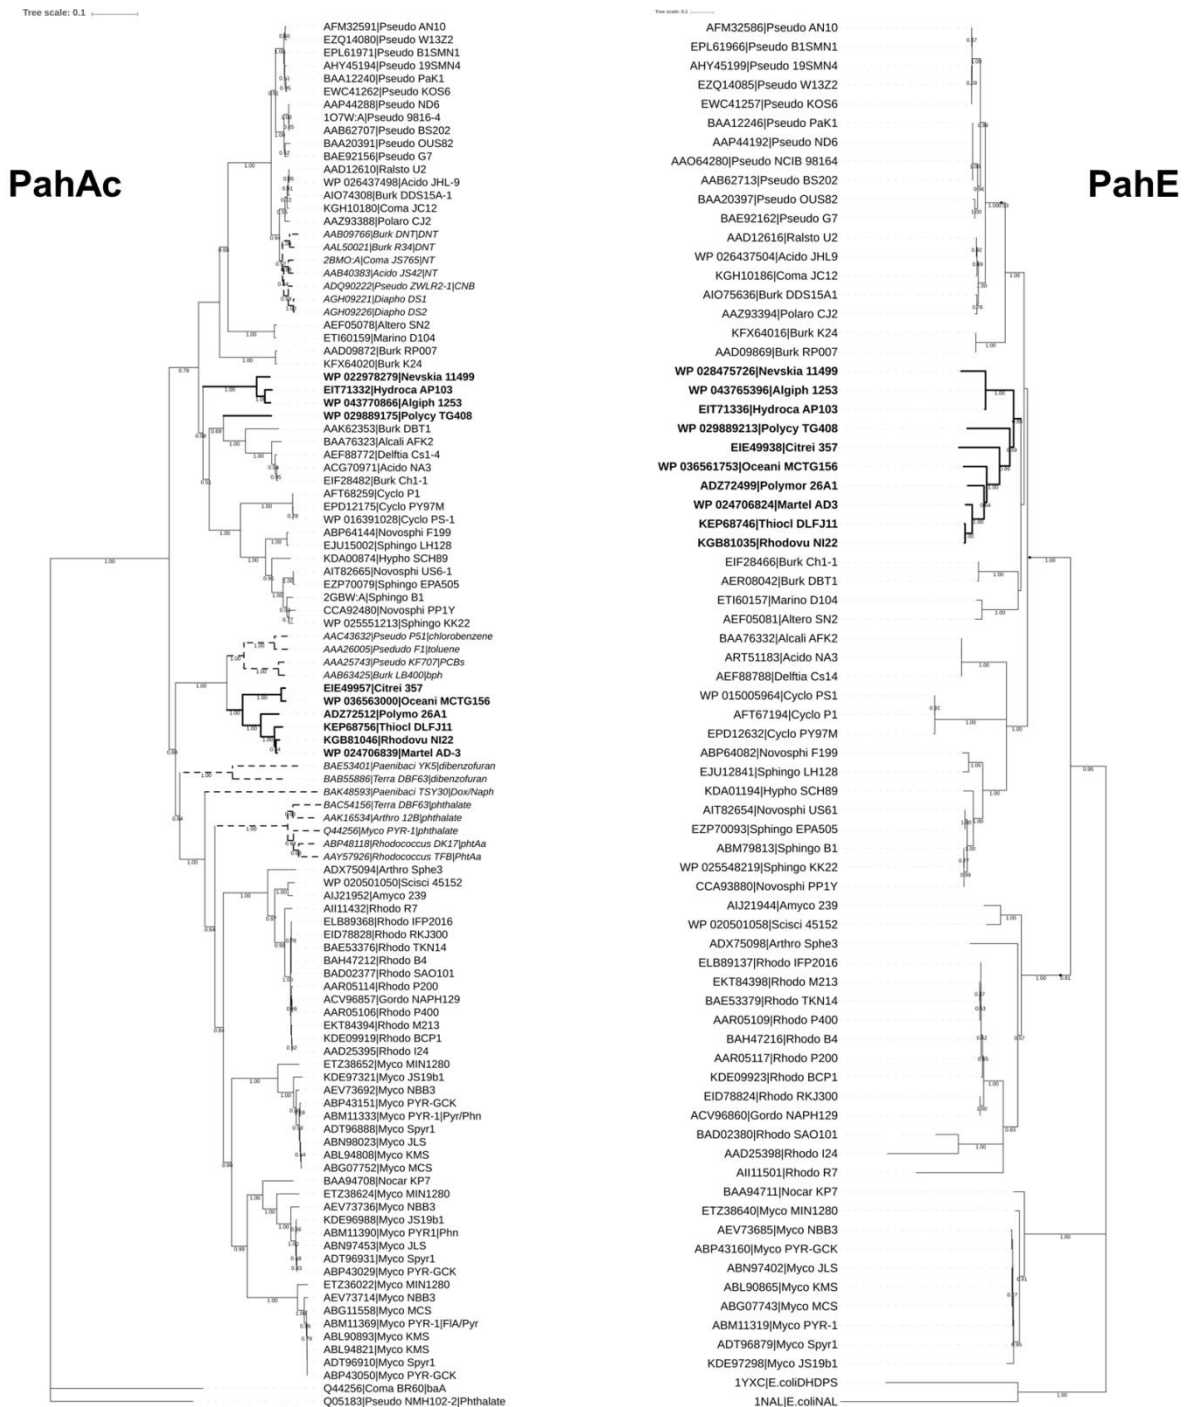

**Fig S2. The details of the comparison of PahE- and PahAc-based phylogenies of PAHs degrading bacteria.** Both panels show majority rule consensus trees based on neighbor-joining method. Bootstrap support is indicated at individual branches, only value greater than 0.5 are shown. The bold text in both trees indicate members of the group of newly-defined potential PAH degraders, which also correspond to each other. The other aromatic-ring-hydroxylating dioxygenase clades (other-*ArhAc*, could not degrade PAH) in PahAc trees are indicated by dashed branches. The scale bar indicates 0.1 branch distance.

## References

1. **Kumar, M., Lakshmi, C.V. and Khanna, S.** 2008. Biodegradation and biotransformation of endosulfan contaminated soil. *Bioresour Technol* **99**: 3116–3122.
2. U.S. EPA Method 3540C, Soxhlet extraction. 1996. <<http://www.epa.gov/osw/hazard/testmethods/sw846/pdfs/3540c.pdf> (14.03.14).
3. **Rose, T. M.; Henikoff, J. G.; Henikoff, S.** 2003. CODEHOP (COnsensus-DEgenerate hybrid oligonucleotide primer) PCR primer design. *Nucleic Acids Res* **31**: 3763-3766.
4. **Vacca, D.; Bleam, W.; Hickey, W.** 2005. Isolation of soil bacteria adapted to degrade humic acid-sorbed phenanthrene. *Appl Environ Microbiol* **71**: 3797-3805.
5. **Bai, X.; Lai, Q.; Dong, C.; Li, F.; Shao, Z.** 2014. *Marinomonas profundimaris* sp. nov., isolated from deep-sea sediment sample of the Arctic Ocean. *Antonie Van Leeuwenhoek* **106**: 449-455.
6. **Sohn, J. H.; Kwon, K. K.; Kang, J. H.; Jung, H. B.; Kim, S. J.** 2004. *Novosphingobium pentaromativorans* sp. nov., a high-molecular-mass polycyclic aromatic hydrocarbon-degrading bacterium isolated from estuarine sediment. *Int J Syst Evol Microbiol* **54**: 1483-1487.
7. **Grund, E.; Denecke, B.; Eichenlaub, R.** 1992. Naphthalene degradation via salicylate and gentisate by *Rhodococcus* sp. strain B4. *Appl Environ Microbiol* **58**: 1874-1877.
8. **Khan, A. A.; Kim, S. J.; Paine, D. D.; Cerniglia, C. E.** 2002. Classification of a polycyclic aromatic hydrocarbon-metabolizing bacterium, *Mycobacterium* sp. strain PYR-1, as *Mycobacterium vanbaalenii* sp. nov. *Int J Syst Evol Microbiol* **52**: 1997-2002.

9. **Zhang, R.; Lai, Q.; Wang, W.; Li, S.; Shao, Z.** 2013. *Thioclava dalianensis* sp. nov., isolated from surface seawater. *Int J Syst Evol Microbiol* **63**: 2981-2985.
10. **Liu, H.; Wang, S.-J.; Zhou, N.-Y.** 2005. A new isolate of *Pseudomonas stutzeri* that degrades 2-chloronitrobenzene. *Biotechnol Lett* **27**: 275-278.
11. **Wu, J.; Shen, X.; Zhou, Y.; Liu, S.** 2004. Characterization of p-chloronitrobenzene-degrading *Comamonas* sp. CNB1 and its Degradation of p-chloronitrobenzene. *Acta Microbiol Sin* **44**: 8-12.
